# Supplementary material
Source: PubMed Central journal article supplement (PMC8488022)
Supplement: NIHMS1737375-supplement-11.pdf [file NIHMS1737375-supplement-11.pdf]

**Table S1. Cryo-EM data collection, image processing, and validation statistics, Related to STAR Methods**

|                                           | miniV1_apo<br>(EMD-23136)<br>(PDB-7L2P) | miniV1_DkTx<br>pre-bound<br>(EMD-23139)<br>(PDB-7L2S) | miniV1_DkTx<br>singly-bound<br>(EMD-23161)<br>no model | miniV1_DkTx<br>pre-open<br>(EMD-23138)<br>(PDB-7L2R) | miniV1_DkTx<br>partial open<br>(EMD-23140)<br>(PDB-7L2T) | miniV1_DkTx<br>open<br>(EMD-23141)<br>(PDB-7L2U) | miniV1_RTX-<br>NMDG a<br>(EMD-23143)<br>(PDB-7L2W) | miniV1_RTX-<br>NMDG b<br>(EMD-23142)<br>(PDB-7L2V) | miniV1_RTX-<br>NMDG c<br>(EMD-23144)<br>(PDB-7L2X) | FLV1_pH6 a<br>(EMD-23129)<br>(PDB-7L2I) | FLV1_pH6 b<br>(EMD-23131)<br>(PDB-7L2K) | FLV1_pH6 c<br>(EMD-23130)<br>(PDB-7L2J) | FLV1_pH5.5_RTX<br>(EMD-23135)<br>(PDB-7L2O) |
|-------------------------------------------|-----------------------------------------|-------------------------------------------------------|--------------------------------------------------------|------------------------------------------------------|----------------------------------------------------------|--------------------------------------------------|----------------------------------------------------|----------------------------------------------------|----------------------------------------------------|-----------------------------------------|-----------------------------------------|-----------------------------------------|---------------------------------------------|
| <b>Data Collection/Processing</b>         |                                         |                                                       |                                                        |                                                      |                                                          |                                                  |                                                    |                                                    |                                                    |                                         |                                         |                                         |                                             |
| Microscope                                | Titan Krios                             | Titan Krios                                           | Titan Krios                                            | Titan Krios                                          | Titan Krios                                              | Titan Krios                                      | Titan Krios                                        | Titan Krios                                        | Titan Krios                                        | Talos Arctica                           | Talos Arctica                           | Talos Arctica                           | Talos Arctica                               |
| Detector                                  | Gatan K2                                | Gatan K3                                              | Gatan K3                                               | Gatan K3                                             | Gatan K3                                                 | Gatan K3                                         | Gatan K3                                           | Gatan K3                                           | Gatan K3                                           | Gatan K2                                | Gatan K2                                | Gatan K2                                | Gatan K2                                    |
| Voltage (kV)                              | 300                                     | 300                                                   | 300                                                    | 300                                                  | 300                                                      | 300                                              | 300                                                | 300                                                | 300                                                | 200                                     | 200                                     | 200                                     | 200                                         |
| Magnification                             | 22,500                                  | 105000                                                | 105000                                                 | 105000                                               | 105000                                                   | 105000                                           | 105000                                             | 105000                                             | 105000                                             | 36,000                                  | 36,000                                  | 36,000                                  | 36,000                                      |
| Defocus Range (µm)                        | -0.2 to -2.0                            | -0.5 to -3.0                                          | -0.5 to -3.0                                           | -0.5 to -3.0                                         | -0.5 to -3.0                                             | -0.5 to -3.0                                     | -0.5 to -3.0                                       | -0.5 to -3.0                                       | -0.5 to -3.0                                       | -0.5 to -2.5                            | -0.5 to -2.5                            | -0.5 to -2.5                            | -0.5 to -2.8                                |
| Pixel Size (Å)                            | 1.059                                   | 0.8488                                                | 0.8488                                                 | 0.8488                                               | 0.8488                                                   | 0.8488                                           | 0.835                                              | 0.835                                              | 0.835                                              | 1.15                                    | 1.15                                    | 1.15                                    | 1.15                                        |
| Total Electron Dose (e/Å <sup>2</sup> )   | 72                                      | 67                                                    | 67                                                     | 67                                                   | 67                                                       | 67                                               | 68.4                                               | 68.4                                               | 68.4                                               | 76.8                                    | 76.8                                    | 76.8                                    | 64                                          |
| Exposure Time (s)                         | 10                                      | 5                                                     | 5                                                      | 5                                                    | 5                                                        | 5                                                | 6                                                  | 6                                                  | 6                                                  | 12                                      | 12                                      | 12                                      | 10                                          |
| Number of Images                          | 3925                                    | 7858+15288                                            | 7858+15288                                             | 7858+15289                                           | 7858+15290                                               | 7858+15291                                       | 3194                                               | 3194                                               | 3194                                               | 700                                     | 700                                     | 700                                     | 885                                         |
| Number of Frames/Image                    | 80                                      | 100                                                   | 100                                                    | 100                                                  | 100                                                      | 100                                              | 120                                                | 120                                                | 120                                                | 60                                      | 60                                      | 60                                      | 50                                          |
| Symmetry imposed                          | C4                                      | C1                                                    | C1                                                     | C1                                                   | C1                                                       | C1                                               | C1                                                 | C1                                                 | C1                                                 | C4                                      | C4                                      | C4                                      | C4                                          |
| Initial Particle Number                   | 1,111,567                               | 1,803,896+6,768,852                                   | 1,803,896+6,768,852                                    | 1,803,896+6,768,852                                  | 1,803,896+6,768,852                                      | 1,803,896+6,768,852                              | 925,366                                            | 925,366                                            | 925,366                                            | 175,735                                 | 175,735                                 | 175,735                                 | 265,119                                     |
| Final Particle Number                     | 97,601                                  | 264,391                                               | 108,641                                                | 39,680                                               | 235,666                                                  | 44,530                                           | 26,158                                             | 40,532                                             | 56,646                                             | 41,166                                  | 11,276                                  | 21,512                                  | 39,056                                      |
| Map resolution (Å)                        | 2.6                                     | 2.71                                                  | 3.03                                                   | 3.3                                                  | 3.08                                                     | 3.47                                             | 3.16                                               | 3.64                                               | 3.26                                               | 3.7                                     | 3.89                                    | 3.66                                    | 3.64                                        |
| FSC threshold                             | 0.143                                   | 0.143                                                 | 0.143                                                  | 0.143                                                | 0.143                                                    | 0.143                                            | 0.143                                              | 0.143                                              | 0.143                                              | 0.143                                   | 0.143                                   | 0.143                                   | 0.143                                       |
| <b>Refinement</b>                         |                                         |                                                       |                                                        |                                                      |                                                          |                                                  |                                                    |                                                    |                                                    |                                         |                                         |                                         |                                             |
| Initial model used (PDB code)             | 3J5P                                    | 3J5P                                                  | n/a                                                    | 3J5P                                                 | 3J5P                                                     | 3J5P                                             | 3J5P                                               | 3J5P                                               | 3J5P                                               | 3J5P                                    | 3J5P                                    | 3J5P                                    | 3J5P                                        |
| Model resolution (Å)                      | 2.7                                     | 2.8                                                   | n/a                                                    | 3.4                                                  | 3.1                                                      | 3.5                                              | 3.2                                                | 3.7                                                | 3.3                                                | 3.8                                     | 4.1                                     | 3.8                                     | 3.8                                         |
| FSC threshold                             | 0.5                                     | 0.5                                                   | n/a                                                    | 0.5                                                  | 0.5                                                      | 0.5                                              | 0.5                                                | 0.5                                                | 0.5                                                | 0.5                                     | 0.5                                     | 0.5                                     | 0.5                                         |
| Map sharpening B factor (Å <sup>2</sup> ) | -92                                     | -104                                                  | n/a                                                    | -98                                                  | -124                                                     | -114                                             | -97                                                | -126                                               | -101                                               | -157                                    | -148                                    | -153                                    | -160                                        |
| Model composition                         |                                         |                                                       |                                                        |                                                      |                                                          |                                                  |                                                    |                                                    |                                                    |                                         |                                         |                                         |                                             |
| Non-hydrogen atoms                        | 18452                                   | 20583                                                 | n/a                                                    | 21381                                                | 20171                                                    | 18821                                            | 17741                                              | 17594                                              | 17749                                              | 17436                                   | 16002                                   | 17340                                   | 15800                                       |
| Protein residues                          | 2234                                    | 2506                                                  | n/a                                                    | 2611                                                 | 2463                                                     | 2286                                             | 2144                                               | 2144                                               | 2144                                               | 2124                                    | 1976                                    | 2116                                    | 1920                                        |
| water                                     | 0                                       | 0                                                     | n/a                                                    | 4                                                    | 4                                                        | 10                                               | 4                                                  | 0                                                  | 0                                                  | 0                                       | 0                                       | 0                                       | 0                                           |
| Ligands                                   | 9                                       | 9                                                     | n/a                                                    | 9                                                    | 9                                                        | 10                                               | 9                                                  | 6                                                  | 9                                                  | 4                                       | 0                                       | 4                                       | 4                                           |
| B factors (Å <sup>2</sup> )               |                                         |                                                       |                                                        |                                                      |                                                          |                                                  |                                                    |                                                    |                                                    |                                         |                                         |                                         |                                             |
| Protein                                   | 69                                      | 89                                                    | n/a                                                    | 95                                                   | 55                                                       | 46                                               | 106                                                | 124                                                | 108                                                | 102                                     | 132                                     | 101                                     | 120                                         |
| Ligand                                    | 51                                      | 57                                                    | n/a                                                    | 70                                                   | 32                                                       | 32                                               | 77                                                 | 88                                                 | 78                                                 | 73                                      | n/a                                     | 64                                      | 61                                          |
| water                                     | n/a                                     | n/a                                                   | n/a                                                    | 67                                                   | 18                                                       | 11                                               | 74                                                 | n/a                                                | n/a                                                | n/a                                     | n/a                                     | n/a                                     | n/a                                         |
| R.m.s. deviations                         |                                         |                                                       |                                                        |                                                      |                                                          |                                                  |                                                    |                                                    |                                                    |                                         |                                         |                                         |                                             |
| Bond lengths (Å)                          | 0.006                                   | 0.007                                                 | n/a                                                    | 0.008                                                | 0.005                                                    | 0.005                                            | 0.015                                              | 0.013                                              | 0.015                                              | 0.012                                   | 0.008                                   | 0.008                                   | 0.015                                       |
| Bond angles (°)                           | 1.168                                   | 1.199                                                 | n/a                                                    | 1.199                                                | 1.069                                                    | 1.051                                            | 1.064                                              | 1.247                                              | 1.332                                              | 1.207                                   | 1.129                                   | 1.073                                   | 1.337                                       |
| Validation                                |                                         |                                                       |                                                        |                                                      |                                                          |                                                  |                                                    |                                                    |                                                    |                                         |                                         |                                         |                                             |
| MolProbity score                          | 1.32                                    | 1.17                                                  | n/a                                                    | 1.14                                                 | 1.09                                                     | 1.09                                             | 1.35                                               | 1.33                                               | 1.34                                               | 1.45                                    | 1.48                                    | 1.34                                    | 1.66                                        |
| Clashscore                                | 1.42                                    | 0.88                                                  | n/a                                                    | 0.61                                                 | 0.67                                                     | 0.83                                             | 1.9                                                | 2.56                                               | 2.13                                               | 2.01                                    | 2.61                                    | 2.22                                    | 3.14                                        |
| Poor rotamers (%)                         | 0.35                                    | 0.32                                                  | n/a                                                    | 0.35                                                 | 0.6                                                      | 0.15                                             | 0.42                                               | 0.37                                               | 0.79                                               | 0.75                                    | 0.46                                    | 0.16                                    | 1.87                                        |
| Ramachandran plot                         |                                         |                                                       |                                                        |                                                      |                                                          |                                                  |                                                    |                                                    |                                                    |                                         |                                         |                                         |                                             |
| Favored (%)                               | 93.17                                   | 93.92                                                 | n/a                                                    | 93.31                                                | 94.53                                                    | 95.19                                            | 94.05                                              | 95.79                                              | 94.94                                              | 92.17                                   | 93.24                                   | 95.14                                   | 95.01                                       |
| Allowed (%)                               | 6.69                                    | 6.04                                                  | n/a                                                    | 6.62                                                 | 5.47                                                     | 4.68                                             | 5.95                                               | 4.21                                               | 5.01                                               | 7.83                                    | 6.56                                    | 4.86                                    | 4.99                                        |
| Disallowed (%)                            | 0.13                                    | 0.04                                                  | n/a                                                    | 0.08                                                 | 0                                                        | 0.13                                             | 0                                                  | 0                                                  | 0.05                                               | 0                                       | 0.2                                     | 0                                       | 0                                           |

  

|                                           | miniV1 in complex with RTX when QX-314 added under low Na <sup>+</sup> concentration |                                                       |                                                       |                                                                 |                                                                 |                                                                | miniV1 in complex with RTX when YO-PRO-1 added under low Na <sup>+</sup> concentration |                                                                    | FLV1_apo<br>(EMD-23128)<br>(PDB-7L2H) | FLV1_RTX C <sub>1</sub><br>(EMD-23134)<br>(PDB-7L2N) | FLV1_RTX O <sub>1</sub><br>(EMD-23132)<br>(PDB-7L2L) | FLV1_RTX C <sub>2</sub><br>(EMD-24083)<br>(PDB-7M25) | FLV1_DkTx-RTX<br>(EMD-23133)<br>(PDB-7L2M) |
|-------------------------------------------|--------------------------------------------------------------------------------------|-------------------------------------------------------|-------------------------------------------------------|-----------------------------------------------------------------|-----------------------------------------------------------------|----------------------------------------------------------------|----------------------------------------------------------------------------------------|--------------------------------------------------------------------|---------------------------------------|------------------------------------------------------|------------------------------------------------------|------------------------------------------------------|--------------------------------------------|
|                                           | 1 perturbed PI<br>(EMD-24084)<br>(PDB-7M26)                                          | 4 partially bound<br>RTX<br>(EMD-24085)<br>(PDB-7M27) | 1 partially bound<br>RTX<br>(EMD-24086)<br>(PDB-7M28) | 2 bound RTX in<br>adjacent pockets<br>(EMD-24087)<br>(PDB-7M2A) | 2 bound RTX in<br>opposite pockets<br>(EMD-24091)<br>(PDB-7M2E) | 3 bound RTX and 1<br>perturbed PI<br>(EMD-24088)<br>(PDB-7M2B) | 4 fully engaged<br>RTX C <sub>1</sub><br>(EMD-24089)<br>(PDB-7M2C)                     | 4 fully engaged<br>RTX C <sub>2</sub><br>(EMD-24090)<br>(PDB-7M2D) |                                       |                                                      |                                                      |                                                      |                                            |
| <b>Data Collection/Processing</b>         |                                                                                      |                                                       |                                                       |                                                                 |                                                                 |                                                                |                                                                                        |                                                                    |                                       |                                                      |                                                      |                                                      |                                            |
| Microscope                                | Titan Krios                                                                          | Titan Krios                                           | Titan Krios                                           | Titan Krios                                                     | Titan Krios                                                     | Titan Krios                                                    | Titan Krios                                                                            | Titan Krios                                                        | Titan Krios                           | Titan Krios                                          | Titan Krios                                          | Titan Krios                                          | Talos Arctica                              |
| Detector                                  | Gatan K3                                                                             | Gatan K3                                              | Gatan K3                                              | Gatan K3                                                        | Gatan K3                                                        | Gatan K3                                                       | Gatan K3                                                                               | Gatan K3                                                           | Gatan K2                              | Gatan K2                                             | Gatan K2                                             | Gatan K2                                             | Gatan K3                                   |
| Voltage (kV)                              | 300                                                                                  | 300                                                   | 300                                                   | 300                                                             | 300                                                             | 300                                                            | 300                                                                                    | 300                                                                | 300                                   | 300                                                  | 300                                                  | 300                                                  | 200                                        |
| Magnification                             | 105,000                                                                              | 105,000                                               | 105,000                                               | 105,000                                                         | 105,000                                                         | 105,000                                                        | 105,000                                                                                | 105,000                                                            | 29,000                                | 130,000                                              | 130,000                                              | 130,000                                              | 36,000                                     |
| Defocus Range (µm)                        | -0.8 to -2.0                                                                         | -0.8 to -2.0                                          | -0.8 to -2.0                                          | -0.8 to -2.0                                                    | -0.8 to -2.0                                                    | -0.8 to -2.0                                                   | -0.8 to -2.0                                                                           | -0.8 to -2.0                                                       | -1.0 to -2.0                          | -1.0 to -2.0                                         | -1.0 to -2.0                                         | -1.0 to -2.0                                         | -0.5 to -3.0                               |
| Pixel Size (Å)                            | 0.834                                                                                | 0.834                                                 | 0.834                                                 | 0.834                                                           | 0.834                                                           | 0.834                                                          | 0.834                                                                                  | 0.834                                                              | 0.822                                 | 1.032                                                | 1.032                                                | 1.032                                                | 1.14                                       |
| Total Electron Dose (e/Å <sup>2</sup> )   | 66                                                                                   | 66                                                    | 66                                                    | 66                                                              | 66                                                              | 66                                                             | 66                                                                                     | 66                                                                 | 74                                    | 70.4                                                 | 70.4                                                 | 70.4                                                 | 55.4                                       |
| Exposure Time (s)                         | 6                                                                                    | 6                                                     | 6                                                     | 6                                                               | 6                                                               | 6                                                              | 6                                                                                      | 6                                                                  | 10                                    | 10                                                   | 10                                                   | 10                                                   | 2.4                                        |
| Number of Images                          | 2427                                                                                 | 2427                                                  | 2427                                                  | 2427                                                            | 2427                                                            | 2427                                                           | 2427                                                                                   | 2427                                                               | 2783                                  | 4022                                                 | 4109                                                 | 4109                                                 | 1174                                       |
| Number of Frames/Image                    | 120                                                                                  | 120                                                   | 120                                                   | 120                                                             | 120                                                             | 120                                                            | 120                                                                                    | 120                                                                | 100                                   | 50                                                   | 50                                                   | 50                                                   | 120                                        |
| Symmetry imposed                          | C1                                                                                   | C1                                                    | C1                                                    | C1                                                              | C1                                                              | C1                                                             | C1                                                                                     | C1                                                                 | C4                                    | C4                                                   | C4                                                   | C4                                                   | C4                                         |
| Initial Particle Number                   | 2,160,229                                                                            | 2,160,229                                             | 2,160,229                                             | 2,160,229                                                       | 2,160,229                                                       | 2,160,229                                                      | 2,361,933                                                                              | 2,361,933                                                          | 2,014,065                             | 3,409,673                                            | 3,409,673                                            | 3,409,673                                            | 818,141                                    |
| Final Particle Number                     | 61,712                                                                               | 23,122                                                | 38,184                                                | 19,877                                                          | 10,873                                                          | 18,122                                                         | 30,401                                                                                 | 42,542                                                             | 151,505                               | 24,855                                               | 29,314                                               | 81,361                                               | 36,689                                     |
| Map resolution (Å)                        | 2.91                                                                                 | 3.35                                                  | 3.18                                                  | 3.46                                                            | 3.42                                                            | 3.72                                                           | 3.03                                                                                   | 2.9                                                                | 2.63                                  | 3.09                                                 | 3.42                                                 | 2.76                                                 | 3.84                                       |
| FSC threshold                             | 0.143                                                                                | 0.143                                                 | 0.143                                                 | 0.143                                                           | 0.143                                                           | 0.143                                                          | 0.143                                                                                  | 0.143                                                              | 0.143                                 | 0.143                                                | 0.143                                                | 0.143                                                | 0.143                                      |
| <b>Refinement</b>                         |                                                                                      |                                                       |                                                       |                                                                 |                                                                 |                                                                |                                                                                        |                                                                    |                                       |                                                      |                                                      |                                                      |                                            |
| Initial model used (PDB code)             | 3J5P                                                                                 | 3J5P                                                  | 3J5P                                                  | 3J5P                                                            | 3J5P                                                            | 3J5P                                                           | 3J5P                                                                                   | 3J5P                                                               | 3J5P                                  | 3J5P                                                 | 3J5P                                                 | 3J5P                                                 | 3J5P                                       |
| Model resolution (Å)                      | 3                                                                                    | 3.5                                                   | 3.2                                                   | 3.6                                                             | 3.6                                                             | 3.8                                                            | 3.2                                                                                    | 2.9                                                                | 2.7                                   | 3.3                                                  | 3.7                                                  | 2.9                                                  | 4                                          |
| FSC threshold                             | 0.5                                                                                  | 0.5                                                   | 0.5                                                   | 0.5                                                             | 0.5                                                             | 0.5                                                            | 0.5                                                                                    | 0.5                                                                | 0.5                                   | 0.5                                                  | 0.5                                                  | 0.5                                                  | 0.5                                        |
| Map sharpening B factor (Å <sup>2</sup> ) | 90                                                                                   | 105                                                   | 85                                                    | 86                                                              | 82                                                              | 98                                                             | 99                                                                                     | 91                                                                 | -94                                   | -99                                                  | -136                                                 | -99                                                  | -176                                       |
| Model composition                         |                                                                                      |                                                       |                                                       |                                                                 |                                                                 |                                                                |                                                                                        |                                                                    |                                       |                                                      |                                                      |                                                      |                                            |
| Non-hydrogen atoms                        | 20381                                                                                | 17893                                                 | 18644                                                 | 18246                                                           | 17622                                                           | 17611                                                          | 17338                                                                                  | 17490                                                              | 17560                                 | 14728                                                | 14256                                                | 14295                                                | 15985                                      |
| Protein residues                          | 2476                                                                                 | 2180                                                  | 2278                                                  | 2229                                                            | 2147                                                            | 2145                                                           | 2112                                                                                   | 2128                                                               | 2123                                  | 1780                                                 | 1716                                                 | 1724                                                 | 1934                                       |
| water                                     | 0                                                                                    | 0                                                     | 0                                                     | 0                                                               | 0                                                               | 0                                                              | 0                                                                                      | 4                                                                  | 0                                     | 0                                                    | 0                                                    | 0                                                    | 0                                          |
| Ligands                                   | 9                                                                                    | 5                                                     | 5                                                     | 5                                                               | 5                                                               | 5                                                              | 6                                                                                      | 6                                                                  | 9                                     | 4                                                    | 4                                                    | 7                                                    | 7                                          |
| B factors (Å <sup>2</sup> )               |                                                                                      |                                                       |                                                       |                                                                 |                                                                 |                                                                |                                                                                        |                                                                    |                                       |                                                      |                                                      |                                                      |                                            |
| Protein                                   | 84                                                                                   | 109                                                   | 104                                                   | 123                                                             | 107                                                             | 134                                                            | 102                                                                                    | 88                                                                 | 80                                    | 97                                                   | 98                                                   | 77                                                   | 105                                        |
| Ligand                                    | 63                                                                                   | 83                                                    | 78                                                    | 102                                                             | 85                                                              | 112                                                            | 65                                                                                     | 58                                                                 | 48                                    | 70                                                   | 65                                                   | 41                                                   | 85                                         |
| water                                     | n/a                                                                                  | n/a                                                   | n/a                                                   | n/a                                                             | n/a                                                             | n/a                                                            | n/a                                                                                    | 51                                                                 | n/a                                   | n/a                                                  | n/a                                                  | n/a                                                  | n/a                                        |
| R.m.s. deviations                         |                                                                                      |                                                       |                                                       |                                                                 |                                                                 |                                                                |                                                                                        |                                                                    |                                       |                                                      |                                                      |                                                      |                                            |
| Bond lengths (Å)                          | 0.009                                                                                | 0.012                                                 | 0.01                                                  | 0.009                                                           | 0.009                                                           | 0.01                                                           | 0.01                                                                                   | 0.007                                                              | 0.005                                 | 0.008                                                | 0.015                                                | 0.013                                                | 0.007                                      |
| Bond angles (°)                           | 1.116                                                                                | 1.281                                                 | 1.14                                                  | 1.152                                                           | 1.166                                                           | 1.204                                                          | 1.22                                                                                   | 1.171                                                              | 1.067                                 | 1.21                                                 | 1.404                                                | 1.196                                                | 1.158                                      |
| Validation                                |                                                                                      |                                                       |                                                       |                                                                 |                                                                 |                                                                |                                                                                        |                                                                    |                                       |                                                      |                                                      |                                                      |                                            |
| MolProbity score                          | 1.22                                                                                 | 1.27                                                  | 1.25                                                  | 1.32                                                            | 1.31                                                            | 1.32                                                           | 1.28                                                                                   | 1.02                                                               | 1.16                                  | 1.25                                                 | 1.52                                                 | 1.06                                                 | 1.3                                        |
| Clashscore                                | 1.16                                                                                 | 1.4                                                   | 1.23                                                  | 1.7                                                             | 1.59                                                            | 1.65                                                           | 1.62                                                                                   | 0.8                                                                | 0.89                                  | 1.56                                                 | 3.4                                                  | 0.77                                                 | 1.79                                       |
| Poor rotamers (%)                         | 0.55                                                                                 | 0.41                                                  | 0.45                                                  | 0.66                                                            | 0.42                                                            | 0.84                                                           | 0.96                                                                                   | 0.59                                                               | 0.53                                  | 0.25                                                 | 0.06                                                 | 0.77                                                 | 0.75                                       |
| Ramachandran plot                         |                                                                                      |                                                       |                                                       |                                                                 |                                                                 |                                                                |                                                                                        |                                                                    |                                       |                                                      |                                                      |                                                      |                                            |
| Favored (%)                               | 94.25                                                                                | 94.11                                                 | 93.96                                                 | 94.01                                                           | 93.92                                                           | 94.01                                                          | 94.58                                                                                  | 96.04                                                              | 94.28                                 | 94.9                                                 | 94.33                                                | 95.47                                                | 94.67                                      |
| Allowed (%)                               | 5.51                                                                                 | 5.71                                                  | 5.81                                                  | 5.99                                                            | 5.84                                                            | 5.9                                                            | 5.28                                                                                   | 3.96                                                               | 5.72                                  | 5.1                                                  | 5.67                                                 | 4.12                                                 | 5.33                                       |
| Disallowed (%)                            | 0.24                                                                                 | 0.18                                                  | 0.22                                                  | 0                                                               | 0.23                                                            | 0.09                                                           | 0.14                                                                                   | 0                                                                  | 0                                     | 0                                                    | 0                                                    | 0.41                                                 | 0                                          |
